# Supplementary material
Source: Springer Nature journal article supplement (https://www.springermedizin.de/resource/supplementary/12905_2013_383_MOESM5_ESM.pdf/9518642)

554.27 1006.25 1010.69 951.87

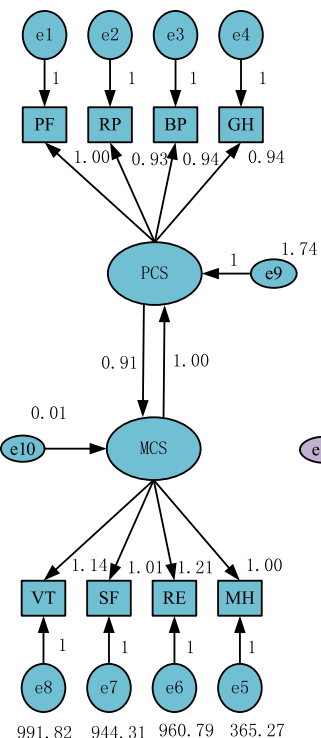

Female

500.38 885.37 817.43 926.45

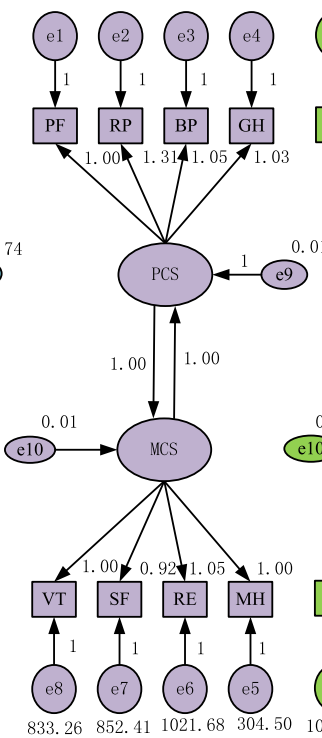

Male

585.87 1035.43 1107.83 958.03

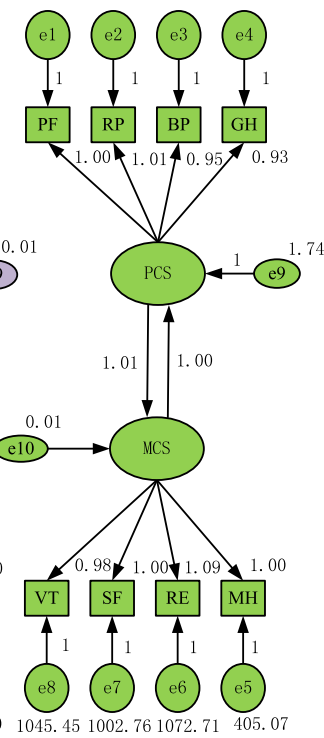

Tracking

Supplement: MOESM5 [file 9518642]
